# Supplementary material for: Improving the Indoor Environment through an Indoor Green Curtain System
Source: MDPI journal article supplement (doi:10.3390/buildings13051307), 2023-05-17
Supplement: s1 [file s1]

# Supplementary material

Solar radiation intensity [W/m<sup>2</sup>]

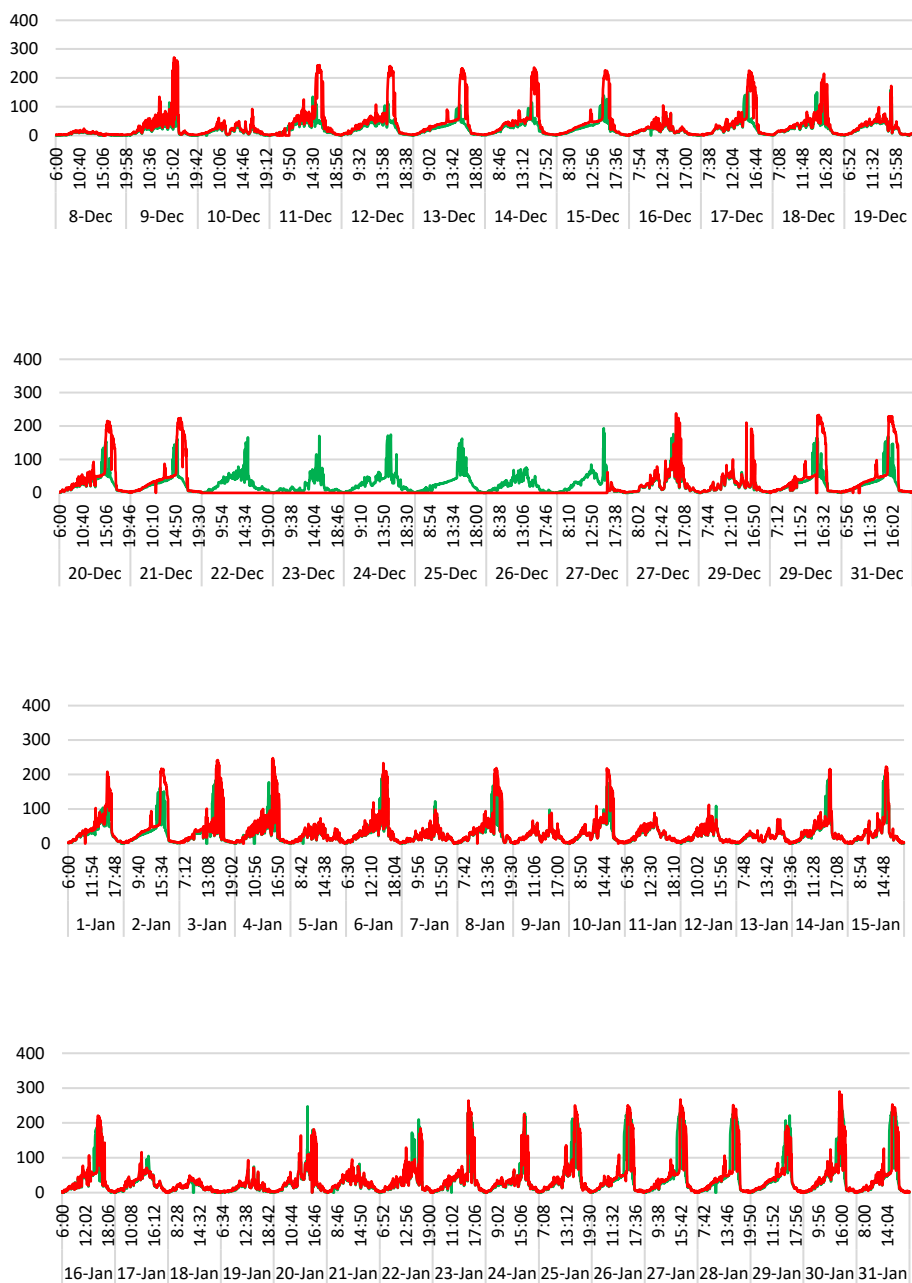

Figure S1 continued....

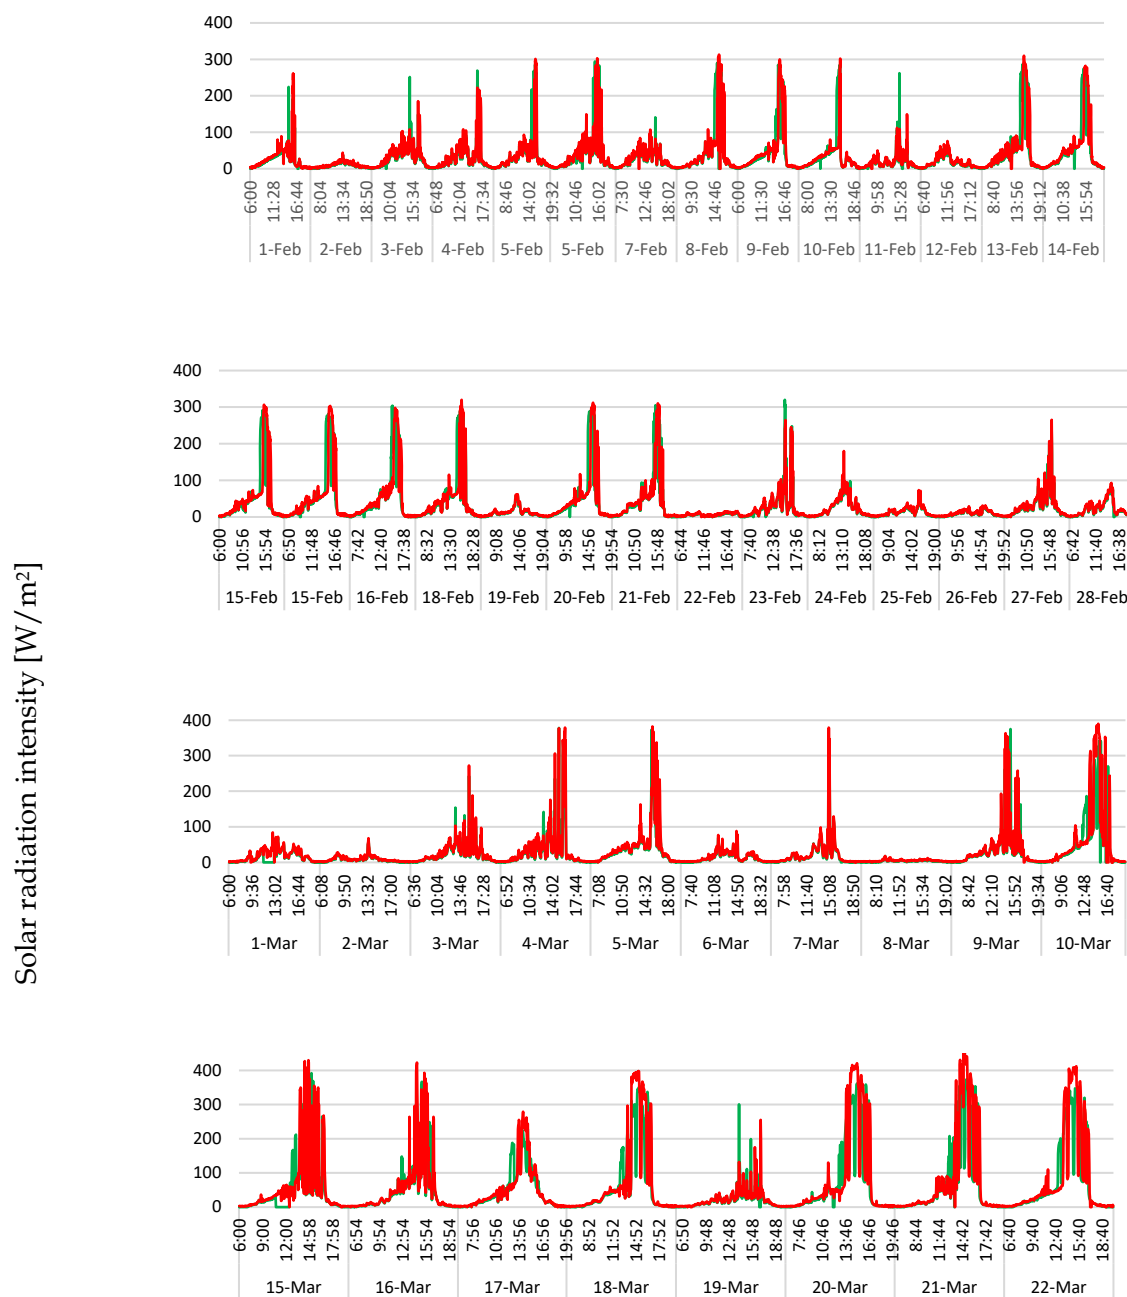

**Figure S1:** Daily pattern of solar radiation intensity during the solar radiation hours from Dec 8, 2021- March 22, 2022. The redline shows the outside solar radiation intensity measured by the sensor installed outside and the green line shows the radiation that passes through the window glass. The flat line from Dec 22-27 (2021), shows the data was not recorded.

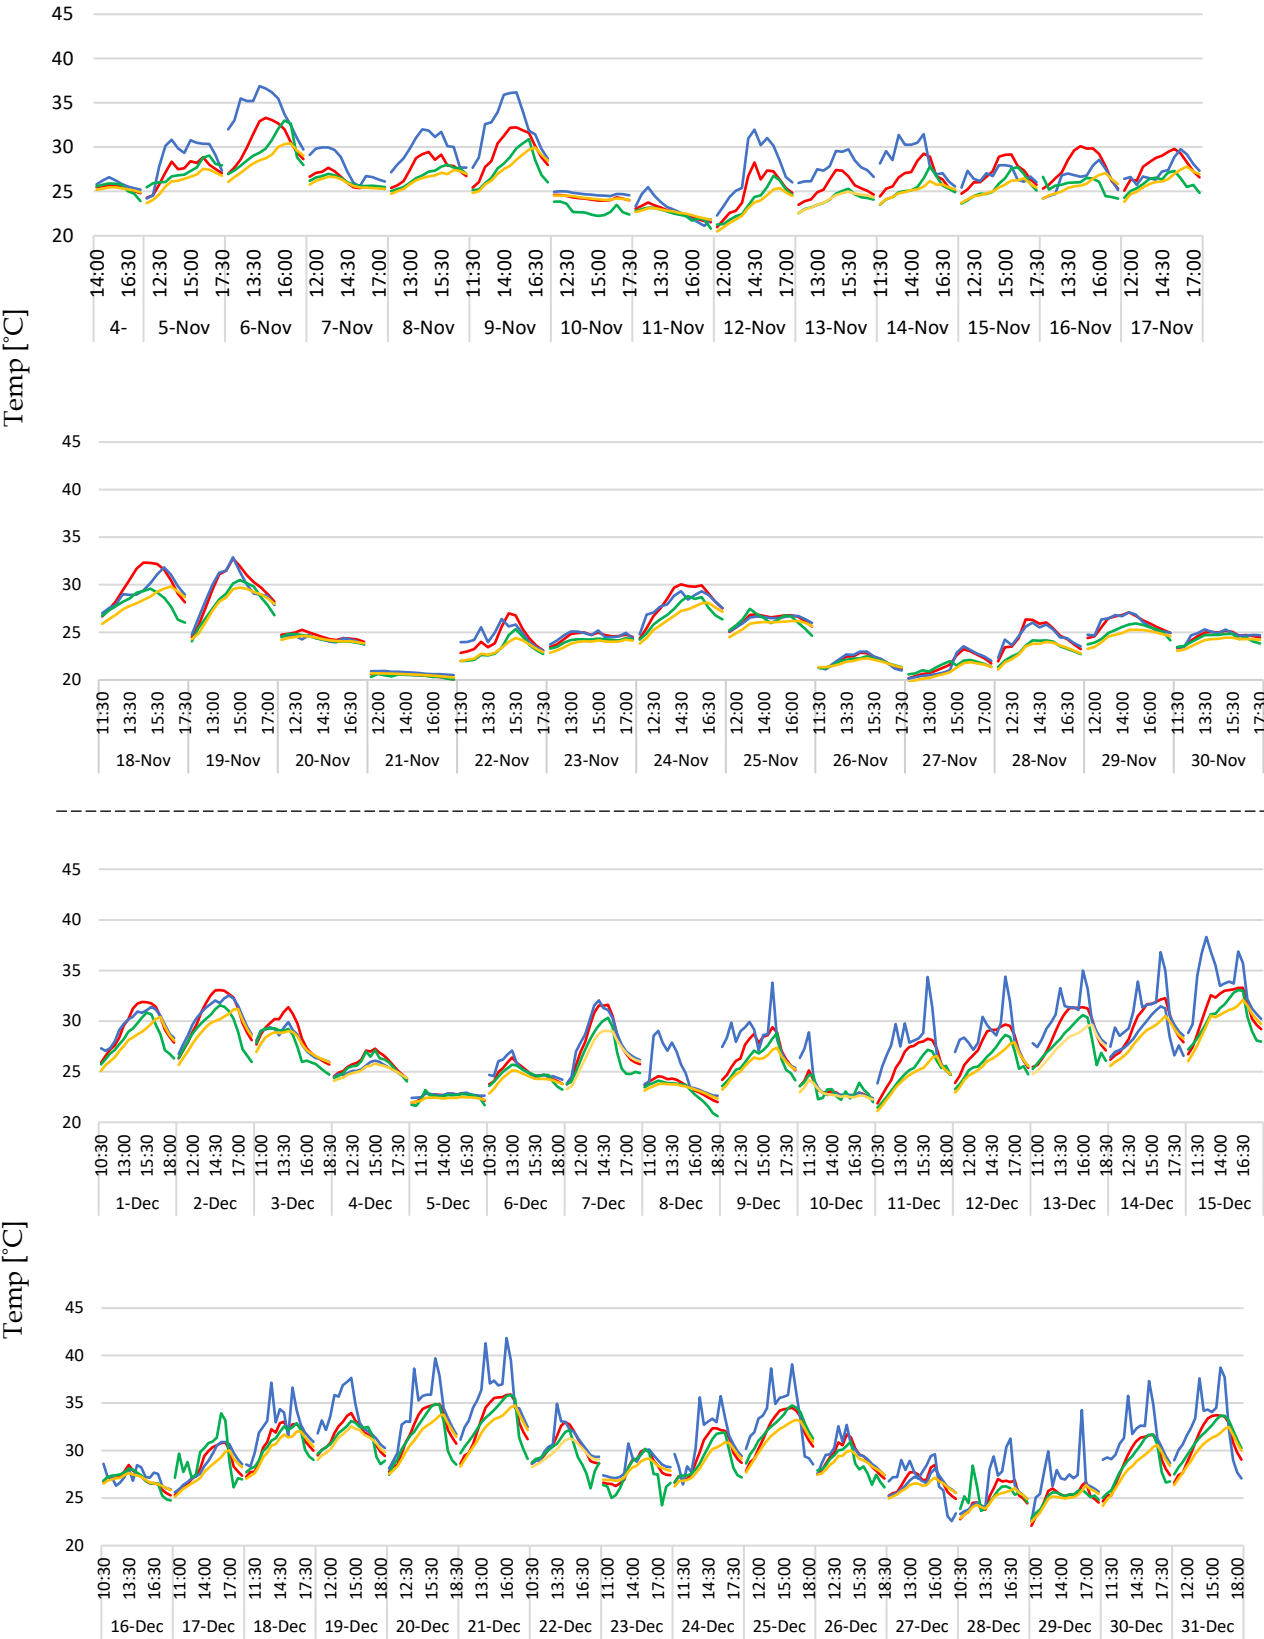

Figure S2 continued....

OT NC GC WB

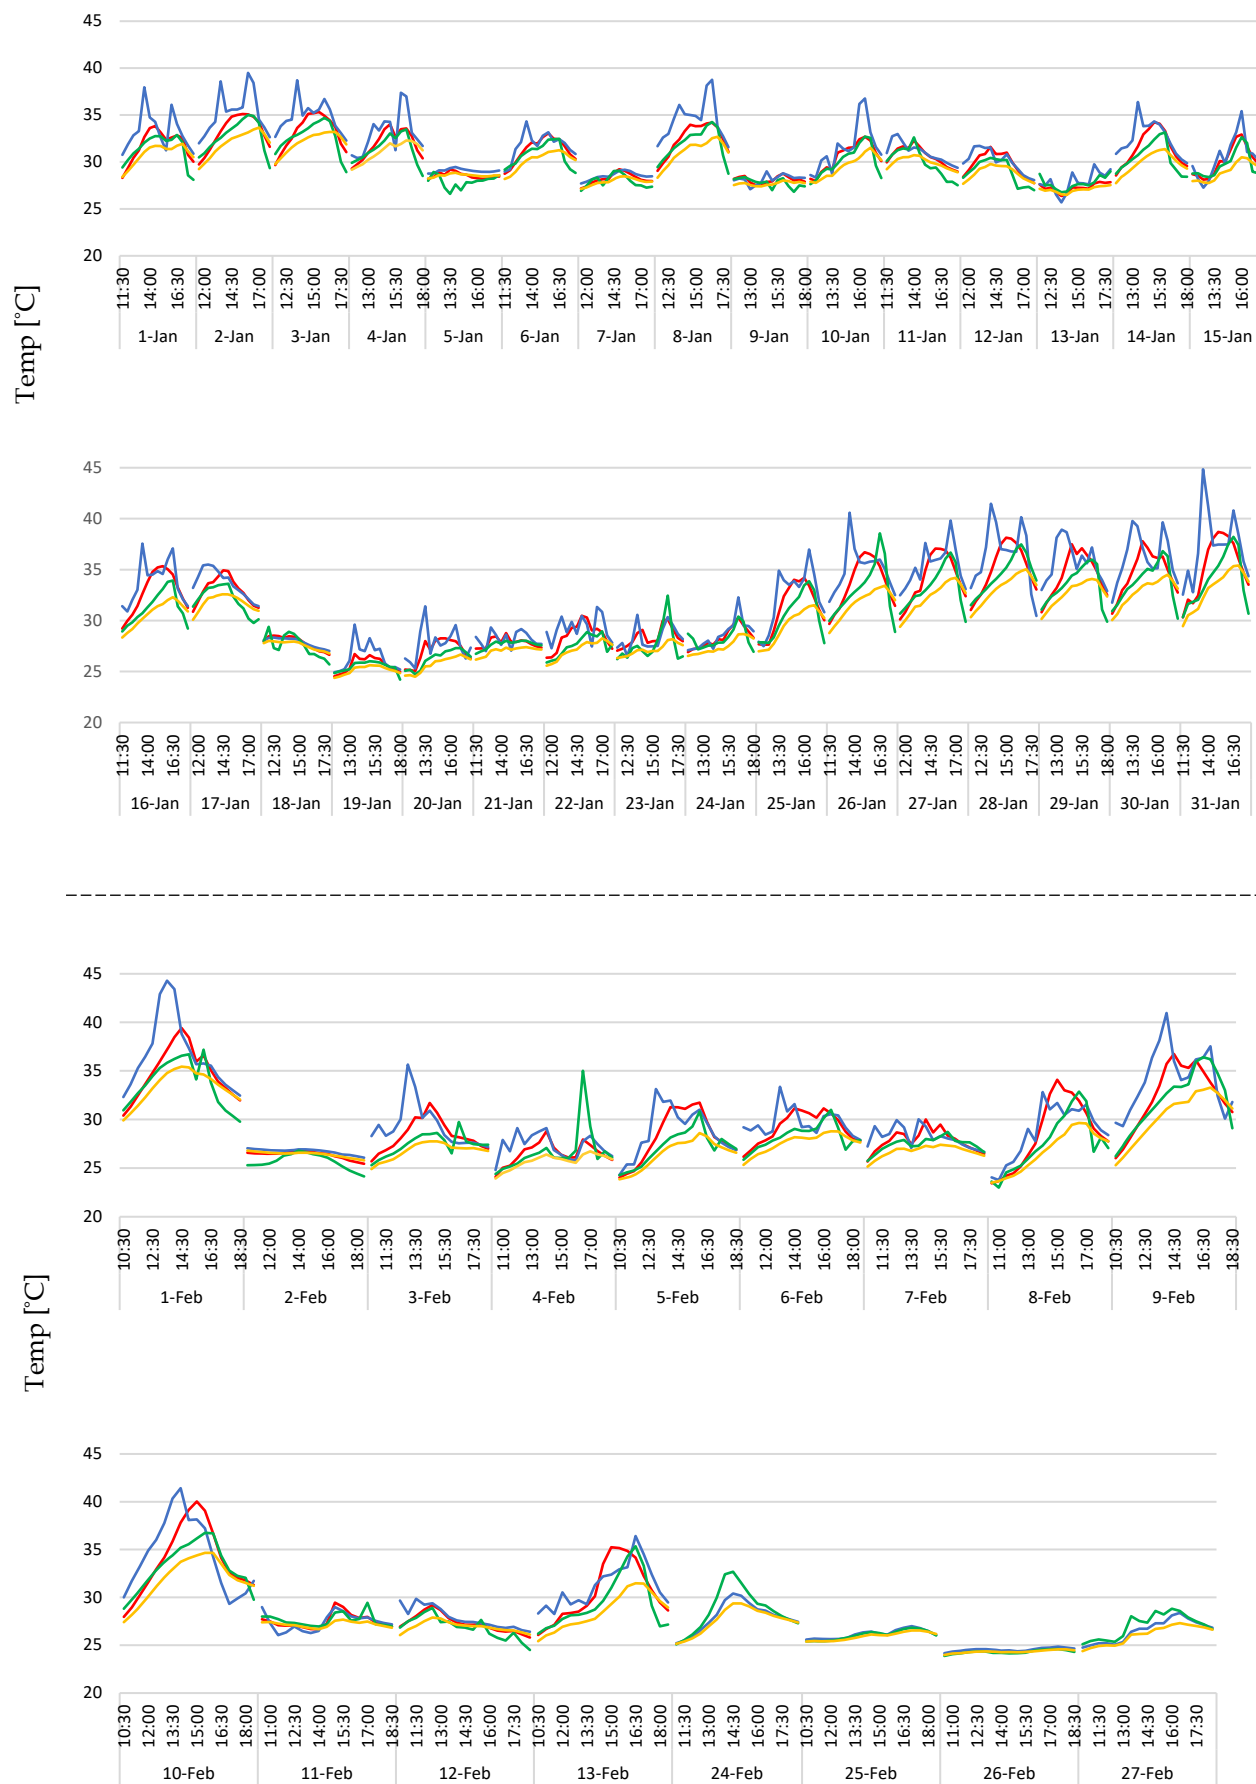

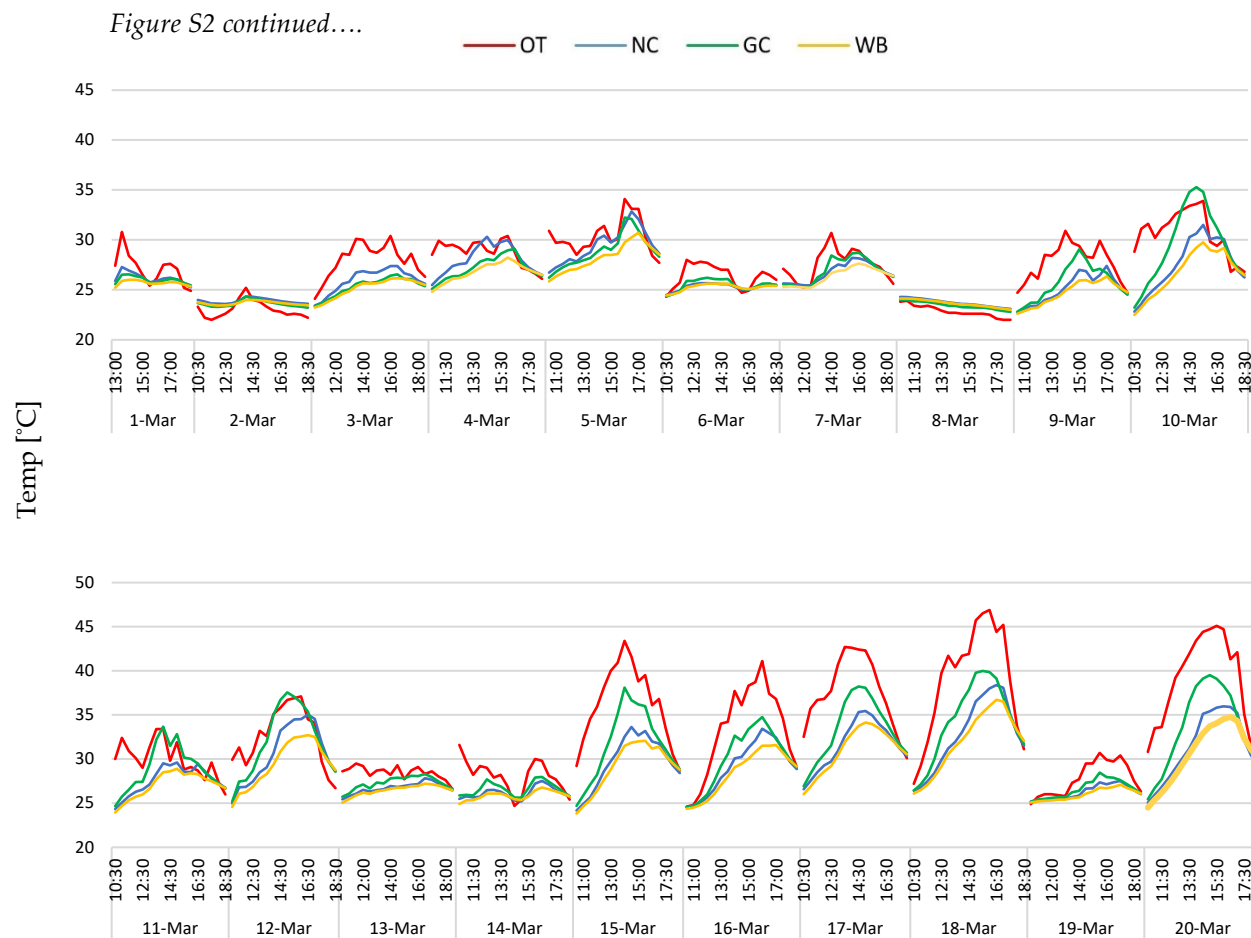

**Figure S2:** Daily pattern of temperatures recorded outside, and in the three modules (NC, GC, WB). The pattern shows three-time frames; before the peak hours, at the peak hours, and after the peak hours. The time frames have changed on daily basis based on the solar angle.

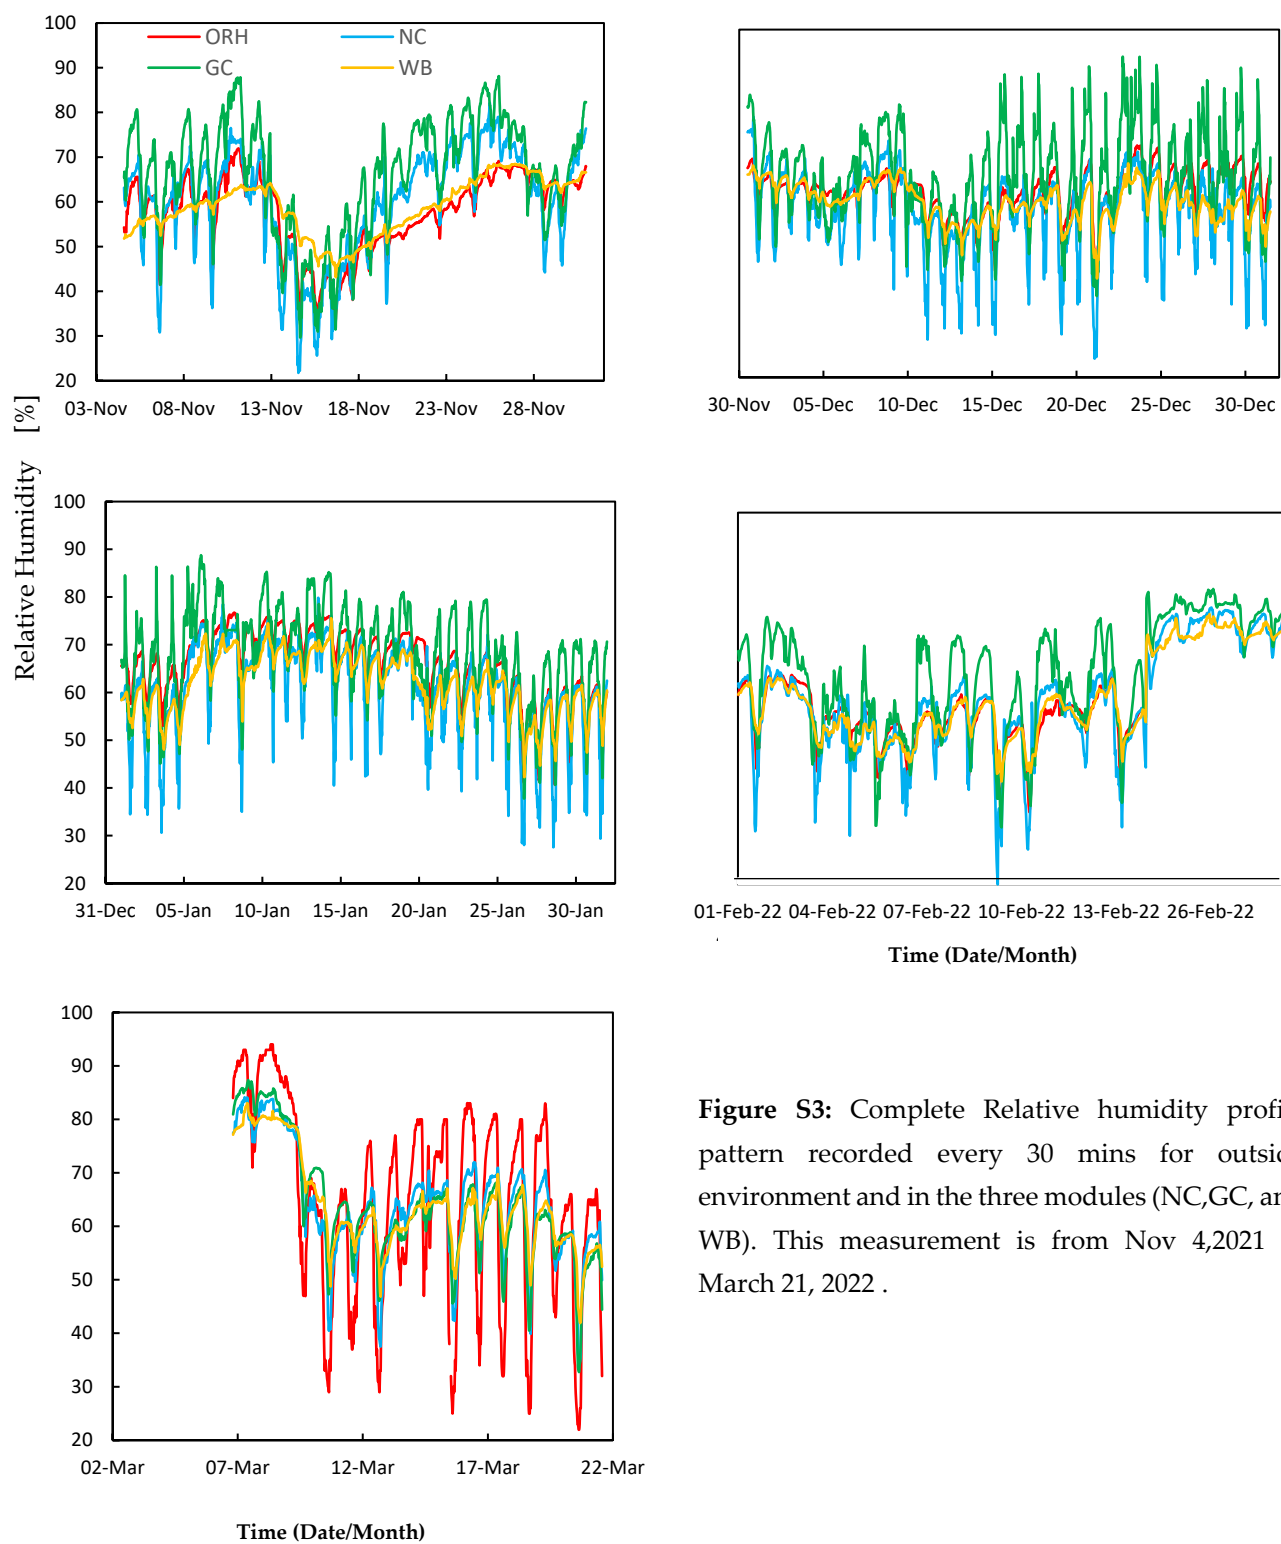

**Figure S3:** Complete Relative humidity profile pattern recorded every 30 mins for outside environment and in the three modules (NC,GC, and WB). This measurement is from Nov 4,2021 to March 21, 2022 .
